# Supplementary material
Source: PubMed Central journal article supplement (PMC3057398)
Supplement: NIHMS267237-supplement-01.pdf [file NIHMS267237-supplement-01.pdf]

# THE LANCET

## Supplementary webappendix

This webappendix formed part of the original submission and has been peer reviewed. We post it as supplied by the authors.

Supplement to: Aufderheide TP, Frascone RJ, Wayne MA, et al. Standard cardiopulmonary resuscitation versus active compression-decompression cardiopulmonary resuscitation with augmentation of negative intrathoracic pressure for out-of-hospital cardiac arrest: a randomised trial. *Lancet* 2011; published online Jan 19. DOI:10.1016/S0140-6736(10)62103-4.

*NOTE: In the following tables, S-CPR refers to standard CPR (the control group) and Device refers to ACD CPR + ITD (study device group).*

**TABLE A: Patients in whom resuscitation was not attempted due to clinical death or DNR orders (N=2327)**

| Criteria                                       | Site 1 |        | Site 2 |        | Site 3 |        | Site 4 |        | Site 5 |        | Site 6 |        | Site 7 |        | TOTAL       |
|------------------------------------------------|--------|--------|--------|--------|--------|--------|--------|--------|--------|--------|--------|--------|--------|--------|-------------|
|                                                | S-CPR  | Device |             |
| Obvious clinical death                         | 238    | 244    | 133    | 135    | 142    | 139    | 258    | 229    | 64     | 49     | 237    | 227    | 40     | 42     | 2177        |
| Do Not Resuscitate (DNR) orders                | 17     | 8      | 4      | 6      | 15     | 8      | 17     | 9      | 12     | 6      | 23     | 20     | 3      | 2      | 150         |
| Total                                          | 255    | 252    | 137    | 141    | 157    | 147    | 275    | 238    | 76     | 55     | 260    | 247    | 43     | 44     | <b>2327</b> |
| % of total screened that were screen failures* | 56.2   | 52.8   | 30.4   | 29.0   | 41.2   | 42.2   | 49.8   | 43.6   | 50.7   | 45.8   | 49.9   | 45.7   | 35.0   | 37.0   | <b>44.2</b> |

\*number excluded for above criteria divided by total number of patients screened

**TABLE B: Patients Excluded- Initial Selection Criteria not met (N=468)**

| Exclusion Criteria                           | Site 1 |        | Site 2 |        | Site 3 |        | Site 4 |        | Site 5 |        | Site 6 |        | Site 7 |        | TOTAL      |
|----------------------------------------------|--------|--------|--------|--------|--------|--------|--------|--------|--------|--------|--------|--------|--------|--------|------------|
|                                              | S-CPR  | Device |            |
| Traumatic etiology                           | 17     | 22     | 29     | 32     | 29     | 29     | 13     | 23     | 8      | 14     | 21     | 26     | 7      | 0      | 270        |
| Known/presumed age < 18                      | 12     | 6      | 29     | 17     | 13     | 9      | 5      | 7      | 3      | 1      | 13     | 9      | 4      | 1      | 129        |
| Resuscitated without EMS CPR                 | 0      | 2      | 3      | 4      | 1      | 0      | 0      | 5      | 0      | 0      | 4      | 4      | 0      | 0      | 23         |
| Prisoner                                     | 0      | 2      | 3      | 2      | 0      | 0      | 0      | 0      | 3      | 3      | 1      | 7      | 1      | 0      | 22         |
| Inability to randomize                       | 0      | 2      | 2      | 2      | 1      | 3      | 0      | 2      | 0      | 0      | 0      | 0      | 0      | 1      | 13         |
| In- hospital cardiac arrest                  | 0      | 0      | 0      | 1      | 0      | 0      | 1      | 1      | 0      | 0      | 0      | 0      | 0      | 0      | 3          |
| Recent sternotomy                            | 0      | 2      | 0      | 1      | 0      | 0      | 1      | 1      | 1      | 0      | 0      | 0      | 0      | 0      | 6          |
| Family requested exclusion at time of arrest | 0      | 0      | 0      | 1      | 0      | 0      | 0      | 1      | 0      | 0      | 0      | 0      | 0      | 0      | 2          |
| <b>Total</b>                                 | 29     | 36     | 66     | 60     | 44     | 41     | 20     | 40     | 15     | 18     | 39     | 46     | 12     | 2      | <b>468</b> |

**TABLE C: Exclusions for Non-Cardiac Etiology**

| Non-Cardiac Etiology Category | Excluded            |                      |
|-------------------------------|---------------------|----------------------|
|                               | S-CPR group (n=256) | Device group (n=296) |
| Trauma                        | 3                   | 10                   |
| Drowning                      | 4                   | 4                    |
| CVA                           | 11                  | 8                    |
| Drug overdose                 | 65                  | 98                   |
| Respiratory                   | 64                  | 72                   |
| Burns                         | 0                   | 1                    |
| Metabolic                     | 13                  | 18                   |
| Seizure                       | 10                  | 6                    |
| Hypothermia                   | 1                   | 1                    |
| Hyperthermia                  | 1                   | 0                    |
| Smoke inhalation              | 0                   | 0                    |
| Other                         | 84 <sup>1</sup>     | 78 <sup>2</sup>      |

<sup>1</sup> anaphylaxis, AAA (10), cancer (15), CO poisoning (5), cerebral bleed, electrocution (2), AIDS, hypovolemia (20), liver failure, meningitis, pulmonary HTN, PE (20), renal failure (2), sepsis (4)

<sup>2</sup> pancreatitis, anaphylaxis, AAA (4), cancer (16), CO poisoning (2), electrocution, head injury, hypovolemia (24), liver failure (2), tissue disease, organ rejection, PE (15), renal failure, sepsis (8)

**TABLE D: Cases with Missing MRS Information for Primary Endpoint**

|    | <b>Group</b> | <b>Discharged alive?</b> | <b>Consent refused?</b> | <b>Alive at one year?</b> | <b>Comment</b>                                                             |
|----|--------------|--------------------------|-------------------------|---------------------------|----------------------------------------------------------------------------|
| 1  | S-CPR        | Yes                      | Yes                     | Yes                       | Patient died >1 year post-arrest                                           |
| 2  | S-CPR        | Yes                      | Yes                     | Unknown                   | Patient died in < 1 year                                                   |
| 3  | Device       | Yes                      | Yes                     | Yes                       | Patient confirmed alive doing well                                         |
| 4  | S-CPR        | Unknown                  | Yes                     | Unknown                   | Unknown if alive despite attempts to locate                                |
| 5  | Device       | Yes                      | Yes                     | Unknown                   | Patient declined consent                                                   |
| 6  | S-CPR        | Unknown                  | Yes                     | Unknown                   |                                                                            |
| 7  | S-CPR        | Yes                      | No                      | Yes                       | Could not contact patient, transferred out of country 3 days post-arrest   |
| 8  | S-CPR        | Yes                      | Yes                     | Unknown                   | Patient left hospital against medical advice                               |
| 9  | S-CPR        | Yes                      | No                      | No                        | Site could not contact patient /family. Patient died < 60 days post arrest |
| 10 | S-CPR        | Yes                      | Yes                     | Unknown                   |                                                                            |
| 11 | Device       | Unknown                  | Yes                     | Unknown                   | Patient/family did not speak English-Communication                         |
| 12 | S-CPR        | Unknown                  | Yes                     | Unknown                   |                                                                            |
| 13 | S-CPR        | Unknown                  | Unknown                 | No                        | Patient died 12 days post arrest                                           |
| 14 | Device       | Unknown                  | Yes                     | No                        | Patient died 6 days post arrest                                            |
| 15 | S-CPR        | Yes                      | Yes                     | Unknown                   | Family refused consent but patient confirmed alive                         |
| 16 | S-CPR        | Unknown                  | Yes                     | Unknown                   | Patient is in nursing home                                                 |
| 17 | S-CPR        | Unknown                  | Yes                     | No                        | Patient died 2 days post arrest, consent refused                           |

Denied Consent: S-CPR- 10/13; Device - 4/4

**Table E: Number of patients alive at hospital discharge and subsequently died, withdrew consent from the study, or were lost to follow-up, between hospital discharge and 365 days**

|                                            | <b>S-CPR</b> | <b>Device</b> |
|--------------------------------------------|--------------|---------------|
| Confirmed alive at Hospital Discharge (HD) | 80           | 104           |
| Confirmed alive at 90 days                 | 58           | 87            |
| Died between HD and 90 days                | 13           | 11            |
| Withdrew consent to follow up              | 6            | 5             |
| Lost to follow –up between HD and 90 days  | 3            | 1             |
| Confirmed alive at 365 days                | 48           | 74            |
| Died between 90 and 365 days               | 6            | 2             |
| Withdrew consent to follow-up              | 3            | 4             |
| Lost to follow-up between 90 and 365 days  | 1            | 7             |

## ACKNOWLEDGEMENTS

This study would not have been possible without the tireless efforts of many individuals, institutions and agencies. The authors would especially like to thank the thousands of first responders, firefighters, EMTs, and paramedics at all the sites who took care of the patients in this study. Without their selfless dedication and lifesaving efforts, survival from out-of-hospital cardiac arrest would not be possible. The authors would like to acknowledge and sincerely thank the following for their passion, dedication, and monumental contributions to the trial:

### **Oshkosh, WI:**

The following individuals from the Oshkosh Fire Department: Tim Franz, Fire Chief; James Austad, Battalion Chief of EMS; John Ziemer, Captain; Chuck Hable, Firefighter, EMT-P, Site Study Coordinator; and Carol Poklasny, Administrative Assistant. EMS Medical Directors: Steve Stroman, MD; Dennis Laundrie, MD. Research nurses: Jayne Tebon, RN. From Froedtert Hospital: Kimberly Deja, RN; Christopher Sparks; Chris von Briesen; David Kitscha; Joseph Brandt, and Dawn Kawa.

The following agencies: Oshkosh Fire Department.

The following hospitals: Mercy Medical Center, Aurora Medical Center, and Theda Clark Medical Center.

The following IRBs: Medical College of Wisconsin, Aurora Health Care, Affinity Health Systems, and Appleton & Theda Clark Medical Centers.

The following organizations: Oshkosh Fire Fighters Local 316 IAFF, Oshkosh Community Media Services, Oshkosh Common Council, Infinity Physicians Group, and Bay Care Clinic Physicians Group.

### **Washtenaw and Livingston Counties, MI:**

The following individuals from St. Joseph Mercy Hospital: Jennifer Fowler, RN, Site Study Coordinator; Robert Dunne, MD; Graham Smith; Monica Rochman; Bethany Braman; Janis Bishop; Janene Bondie; Sheree Brown; Bryan Hornacek and Jeanni McAbee. The following Washtenaw/ Livingston EMS

trainers: Max Anthouard, Layne Caskey, Don Collick, Kevin Cornell, Jon Dehanke, Sean Donohoe, Jaimie Enyedy, Erik Epskamp, Rick Ericson, Robert Feig, Kevin Gentry, Sean Gleason, Dan Hammon, Jeff Hough, Brian Howell, Eric Lapress, Kim McEvoy, Nick Miller, David Music, Matt Smith, Dennis Timmerman, Gretchen Virlee, Ben Oliver, Sean Pochik, Christopher Smyth, Robert Stevens, John Waters, Kevin Wilkenson, Dave Wisley and John Wright. From Livingston County EMS: Jeff Boyd. From Huron Valley Ambulance: Roger Simpson and Randy Bloom.

The following agencies: Ann Arbor City Fire Department, Ann Arbor Township Fire Department, Augusta Township Fire Department, Brighton Area Fire Department, Chelsea Area Fire Authority, Dexter Area Fire Department, Fenton City Fire Department, Fenton Township Fire Department, Fowlerville Fire Department, Green Oak Township Fire Department, Hamburg Township Fire Department, Hartland Area Fire Department, Howell Area Fire Department, Huron Valley Ambulance, Livingston County EMS, Lyon Township Fire Department, Manchester Township Fire Department, Milan Area Fire Department, Northfield Township Fire Department, Pittsfield Township Fire Department, Putnam Township Fire Department, Salem Township Fire Department, Saline Area Fire Department, Scio Township Fire Department, South Lyon Fire Department, Stockbridge Area Ambulance, Superior Township Fire Department, Unadilla Township Fire Department, Ypsilanti City Fire Department, and Ypsilanti Township Fire Department.

The following hospitals: St. Joseph Mercy Hospital, Genesys Regional Medical Center, Detroit Medical Center/Huron Valley-Sinai Hospital, and University of Michigan Health System.

The following IRBs: St. Joseph Mercy, University of Michigan Medical School, Genesys Regional Medical Center, and Wayne State University.

The following organizations: Washtenaw/Livingston Medical Control Authority.

**St. Paul, MN:**

The following individuals from Regions Hospital: Sandi Wewerka, MA, EMT-B, Site Study Coordinator; Josh Salzman, MA; Jennifer Smith, EMT-I; Karen Manor, RN; Deanna Koenekamp, RN; Gayle

Anderson, RN; Andrew Hebdon, RN; EMS Clinical Supervisor Kent Griffith, RN, EMT-P; EMS Clinical Supervisor David Hodgson, EMT-P; past EMS Clinical Supervisor Joe Jensen, RN, EMT-P; Koren Kaye, MD; Jennifer Conners, EMT-P; and IRB Manager Bobette Godding. From the St. Paul Fire Department: Chief Tim Butler; EMS Deputy Chief Matthew Simpson; former EMS Deputy Chief Sue Jacobson; and EMS Coordinator Robert Pitts.

The following agencies: St. Paul Fire Department.

The following hospitals: Regions Hospital, United Hospital, St. Joseph's Hospital, and St. John's Hospital.

The following IRBs: HealthPartners, HealthEast Care System, and Allina Hospitals and Clinics.

The following organizations: Fire Fighters Local 21; and Guidant Foundation, HealthPartners Research Foundation, and the Minnesota Metropolitan Emergency Service Board (Metro Region) provided funding support.

### **Minneapolis, MN:**

The following individuals from Hennepin County Medical Center/Ambulance: George Vasquez, BA, NREMT-P, Site Study Coordinator; Denise Gilbert, RN; Viktors Rozenbergs, EMT-P; Erin Glover, NREMT; Jennifer White, EMT-P; Rob Snyder, EMT-P; Dave Pickford, EMT-P; Joni Kopitze, RN; Joseph Clinton, MD; Deborah Baker; Martin Van Buren, MBA, EMT-P; Dave Rogers, EMT-P; Charlie Moen, MS, MA, EMT-P; and Joni Egan. From the Minneapolis Fire Department: EMS Chief Charlotte Holt, EMT-P, BGS, RN; Captain Perry Ebner; Firefighter Terrill Griffin; Staff Captain Toni Serrata; Captain John Dick; Office Support Specialist II Merry Thurn; former Fire Chief Bonnie Bleskachek; and former Assistant Fire Chief John Fruetel. From North Memorial Medical Center/Ambulance: G. Patrick Lilja, MD; Marc Conterato, MD; Vice President Mike Parrish; John Riley, EMT-P; and Kim Tast, EMT-P. The following agencies: Minneapolis Fire Department, Hennepin County Medical Center Ambulance Service, and North Memorial Ambulance Service.



The following hospitals: Hennepin County Medical Center, Abbott-Northwestern Hospital, North Memorial Medical Center, Methodist Hospital, Fairview/University of Minnesota Medical Center, and Fairview Southdale Hospital.

The following IRBs: Hennepin County Medical Center, North Memorial Health Care, Allina Hospitals and Clinics, Fairview/University of Minnesota, and Methodist Hospital.

### **Indianapolis, IN:**

The following individuals from Wishard Hospital: Gretchen Huffman, RN, Site Study Coordinator; Catherine Marriott; Charles Miramonti, MD; Elizabeth Riley; Jason Schreiderer; and Michael Thralls; Community Hospitals: Eric Vonderohe, MD; Methodist Hospital: Ed Bartkus, MD; Carmel Fire Department: Mark Hulett; Indianapolis Fire Department: Shawn Christopher.

The following agencies: Wishard Ambulance Service, Indianapolis Fire Department, Speedway Fire Department, and Carmel Fire Department.

The following hospitals: St. Vincent's Hospitals, Clarian Hospitals, Community Hospitals, Wishard Memorial Hospital, and Methodist Hospital.

The following IRBs: Wishard Hospital, St. Vincent Hospital, Community Health Network, and Clarian Health Network.

### **Oakland and Macomb Counties, MI:**

The following individuals from William Beaumont Hospital - Royal Oak: Patrick Medado, Site Study Coordinator; Duane Robinson, Site Study Coordinator; Brian O'Neil, MD; Heather Grace; Rosemarie Hunt-Walch; and Robert Duke. From Alliance Mobile Health: CEO Laurie Thiel; and Michael Koehler, EMTPIIC. From Birmingham Fire Department: Fire Chief Michael Metz and Captain John Connaughton. From Royal Oak Fire Department: Captain Dan Allen. From Sterling Heights Fire Department: Chief John Childs; Chief Steve Kovalcik; Assistant Chief Mike Deprez; Training Chief Dan Media; Captain Troy Ferguson, Will Walker, EMTPIIC. From Henry Ford Macomb Hospital: Jennifer Stevenson, DO.

From St. John Macomb Hospital: Michael Kobernick, MD. From St. John Oakland Hospital: Tony Bonfiglio, MD. From St. Joseph Mercy Oakland Hospital: Mary Jo Malafa, MD.

The following agencies: Alliance Mobile Health, Birmingham Fire Department, Ferndale Fire Department, Royal Oak Fire Department, and Sterling Heights Fire Department.

The following hospitals: William Beaumont Hospital - Royal Oak, William Beaumont Hospital - Troy, Henry Ford Macomb Hospital, St. John Macomb-Oakland Hospital, St. Joseph Mercy Oakland Hospital, and St. John Providence Hospital.

The following IRBs: William Beaumont Hospitals, St. John Health Providence, St. John Hospital and Medical Center, St. Joseph's Healthcare, St. Joseph's Mercy Oakland, and Henry Ford Health System.

The following organizations: Oakland County Medical Control Authority and Macomb County Medical Control Authority.

#### **Whatcom County, WA:**

The following individuals from Whatcom County EMS and Trauma Care Council: Janice Lapsansky, MS, EMT-B, Site Study Coordinator; Dawn Cannizzaro, RN, EMT-B; Keri Snodgrass, Operations Manager. From PeaceHealth St. Joseph Medical Center: Naomi Jones, RN; and Kristie D'Angelo, RN, EMT-B.

The following agencies: Whatcom County EMS System.

The following hospitals: PeaceHealth St. Joseph Medical Center.

The following IRBs: PeaceHealth.

The following organizations: Whatcom County EMS & Trauma Care Council and North Cascade Cardiology.
